# Supplementary material for: Precise and scalable self-organization in mammalian pseudo-embryos
Source: Springer Nature journal article supplement (doi:10.1038/s41594-024-01251-4), 2024-03-15
Supplement: 41594_2024_1251_MOESM1_ESM.pdf [file 41594_2024_1251_MOESM1_ESM.pdf]

# Precise and scalable self-organization in mammalian pseudo-embryos

---

In the format provided by the authors and unedited

### I. Supplemental tables

| <b>Time</b> \ $N_0$ | 50 | 100 | 150 | 200 | 250 | 300 | 350 | 400 | 450 | 500 | 550 | 600 | 700 | 800 | 900 | 1000 | 1100 |
|---------------------|----|-----|-----|-----|-----|-----|-----|-----|-----|-----|-----|-----|-----|-----|-----|------|------|
| 24h                 | 3  | 28  | 18  | 15  | 10  | 30  | 17  | 16  | 11  | 31  | 14  | 16  | 16  | 4   | 18  | 4    | 6    |
| 48h                 | 11 | 27  | 17  | 15  | 12  | 34  | 15  | 18  | 12  | 31  | 17  | 16  | 16  | 6   | 18  | 6    | 6    |
| 72h                 | 3  | 28  | 17  | 18  | 12  | 33  | 16  | 17  | 12  | 34  | 17  | 18  | 16  | 6   | 15  | 6    | 4    |
| 96h                 | 5  | 29  | 18  | 16  | 10  | 32  | 17  | 17  | 12  | 34  | 15  | 18  | 16  | 6   | 17  | 5    | 5    |
| 120h                | 5  | 26  | 18  | 15  | 10  | 31  | 15  | 13  | 11  | 30  | 14  | 15  | 10  | 2   | 15  | 5    | 2    |

TABLE S1. Number of samples for the size scaling data over a wide  $N_0$  range 50–1100 with FACS seeding. Used in Fig. 1b, d, and Extended Data Fig. 2d, e, g.

| <b>Time</b> \ $N_0$ | 100 | 300 | 500 | 800 |
|---------------------|-----|-----|-----|-----|
| 24h                 | 25  | 25  | 30  | 27  |
| 48h                 | 23  | 26  | 26  | 24  |
| 72h                 | 26  | 25  | 28  | 23  |
| 96h                 | 25  | 23  | 30  | 27  |
| 120h                | 23  | 22  | 20  | 14  |

TABLE S2. Number of samples for the size scaling data with FACS seeding. Used in Fig. 1b inset, and Extended Data Fig. 2e.

| <b>Time</b> | <b>Regression slope</b> | <b>Standard error</b> |
|-------------|-------------------------|-----------------------|
| 24h         | 1.002                   | 0.016                 |
| 48h         | 0.999                   | 0.010                 |
| 72h         | 1.001                   | 0.013                 |
| 96h         | 1.001                   | 0.013                 |
| 120h        | 1.003                   | 0.033                 |

TABLE S3. Results of linear fits for the data points of individual gastruloids with  $\bar{N}_0 = 300$  in the inset of Fig. 1d. We performed a linear fit for the cell count  $N(t)/\bar{N}_{300}(t)$  as a function of the initial seed cell count  $N_0/300$ . We find that the slopes are equal to one within error bars, i.e. they are statistically indistinguishable from one at all time points.

| <b>Time</b> \ $N_0$ | 220 | 240 | 260 | 280 | 300 | 320 | 340 | 360 |
|---------------------|-----|-----|-----|-----|-----|-----|-----|-----|
| 24h                 | 1   | 1   | 5   | 7   | 13  | 19  | 5   | 2   |
| 48h                 | 0   | 1   | 4   | 7   | 13  | 14  | 5   | 2   |
| 72h                 | 0   | 1   | 4   | 6   | 14  | 15  | 4   | 2   |
| 96h                 | 1   | 1   | 6   | 9   | 14  | 13  | 6   | 2   |
| 120h                | 1   | 0   | 2   | 4   | 8   | 13  | 4   | 2   |

TABLE S4. Number of samples for the size scaling around  $N_0 = 300$  by bin. Used in Fig. 1d inset.

| <b>Gene</b> \ $\bar{N}_0$ | 100 | 200 | 300 | 400 | 500 | 800 |
|---------------------------|-----|-----|-----|-----|-----|-----|
| SOX2, CDX2                | 43  | 53  | 49  | 41  | 35  |     |
| BRA                       | 35  | 38  | 27  | 25  | 42  |     |
| FOXC1                     | 41  |     | 36  |     | 28  | 24  |

TABLE S5. Number of samples for the gene expression pattern scaling data. Used in Fig. 4b, c, and Extended Data Fig. 9, 10.

| Year | Exp № |    |   |    |   |   |
|------|-------|----|---|----|---|---|
|      | 1     | 2  | 3 | 4  | 5 | 6 |
| 2020 | 6     | 5  | 6 | 10 | 4 | 6 |
| 2021 | 6     | 6  | 8 |    |   |   |
| 2022 | 24    | 51 |   |    |   |   |
| 2023 | 44    |    |   |    |   |   |

TABLE S6. Number of samples for the average midline length determination with FACS seeding as a function of time and for different experiments. Used in Extended Data Fig. 2f.

| Year | Exp № |    |    |    |    |    |    |    |    |
|------|-------|----|----|----|----|----|----|----|----|
|      | 1     | 2  | 3  | 4  | 5  | 6  | 7  | 8  | 9  |
| 2021 | 52    |    |    |    |    |    |    |    |    |
| 2022 | 54    | 15 | 13 | 13 | 18 | 21 | 15 | 48 | 44 |

TABLE S7. Number of samples for the average midline length determination with manual seeding as a function of time and for different experiments. Used in Extended Data Fig. 2f.

| Exp № | Replica |    |    |
|-------|---------|----|----|
|       | 1       | 2  | 3  |
| I     | 48      | 43 | 46 |
| II    | 39      | 36 | 33 |
| III   | 25      | 32 | 27 |
| IV    | 30      | 33 | 32 |

TABLE S8. Number of samples for the repeatability and reproducibility of a single experiment with three same-day replicas. Used in Extended Data Fig. 8.

| Gene  | Position             |                      |      |
|-------|----------------------|----------------------|------|
|       | 25%                  | 50%                  | 75%  |
| SOX2  | $1.6 \cdot 10^{-4}$  | $7.4 \cdot 10^{-12}$ | 0    |
| CDX2  | $4.7 \cdot 10^{-6}$  | $6.7 \cdot 10^{-16}$ | 0    |
| BRA   | 0                    | 0                    | 0    |
| FOXC1 | $4.3 \cdot 10^{-11}$ | $2.1 \cdot 10^{-3}$  | 0.94 |

TABLE S9.  $p$ -values for the linear regression of the relative position of the 25%, 50% and 75% maximum intensity levels as a function of  $L$  for each gastruloid (Extended Data Fig. 10c).

| Antibodies        | Species | Reference  | Provider    | Dilution |
|-------------------|---------|------------|-------------|----------|
| SOX2              | Rat     | 14-9811-82 | eBioscience | 1:200    |
| CDX2              | Rabbit  | EPR2764Y   | Invitrogen  | 1:200    |
| BRA               | Rabbit  | ab209665   | Abcam       | 1:150    |
| FOXC1             | Rabbit  | ab223850   | Abcam       | 1:500    |
| Anti-Rat AF488    | Donkey  | A-21208    | Invitrogen  | 1:500    |
| Anti-Rabbit AF647 | Donkey  | A-31573    | Invitrogen  | 1:500    |

TABLE S10. List of antibodies used for immunofluorescence staining (see Methods).

| Initial mESC seed size | Midline length                                 | Volume                                                       | Cell count                                                   |
|------------------------|------------------------------------------------|--------------------------------------------------------------|--------------------------------------------------------------|
| $\bar{N}_0 = 100$      | $322 \pm 30 \mu\text{m}$<br>(9.4%, $n = 23$ )  | $4.2 \pm 0.6 \cdot 10^6 \mu\text{m}^3$<br>(14.5%, $n = 23$ ) | $3.0 \pm 0.4 \cdot 10^3 \text{ cells}$<br>(12.6%, $n = 23$ ) |
| $\bar{N}_0 = 300$      | $494 \pm 52 \mu\text{m}$<br>(10.5%, $n = 22$ ) | $1.4 \pm 0.2 \cdot 10^7 \mu\text{m}^3$<br>(13.6%, $n = 22$ ) | $1.0 \pm 0.1 \cdot 10^4 \text{ cells}$<br>(9.5%, $n = 22$ )  |
| $\bar{N}_0 = 500$      | $673 \pm 68 \mu\text{m}$<br>(10.2%, $n = 20$ ) | $2.5 \pm 0.4 \cdot 10^7 \mu\text{m}^3$<br>(14.6%, $n = 20$ ) | $1.9 \pm 0.2 \cdot 10^4 \text{ cells}$<br>(9.4%, $n = 20$ )  |
| $\bar{N}_0 = 800$      | $754 \pm 59 \mu\text{m}$<br>(7.8%, $n = 14$ )  | $3.7 \pm 0.7 \cdot 10^7 \mu\text{m}^3$<br>(19.3%, $n = 14$ ) | $2.7 \pm 0.4 \cdot 10^4 \text{ cells}$<br>(13.7%, $n = 14$ ) |

TABLE S11. Gastruloid midline length, volume and cell count at 120 h for different values of  $\bar{N}_0$ . These values were obtained from the chemical dissociation of gastruloids seeded using FACS (Extended Data Fig. 1e and 7c). All numbers are means  $\pm$  standard deviations across  $n$  gastruloids. The coefficient of variation, defined by the ratio of standard deviation over mean, is reported in %.
